# Supplementary material for: Copper–organic frameworks assembled from in situ generated 5-(4-pyridyl)tetrazole building blocks: synthesis, structural features, topological analysis and catalytic oxidation of alcohols
Source: Royal Society of Chemistry journal article supplement (doi:10.1039/c4dt00531g), 2014-01-01
Supplement: c4dt00531g1.pdf [file c4dt00531g1.pdf]

1 **Copper-organic frameworks assembled from *in-situ* generated 5-(4-**  
2 **pyridyl)tetrazole building blocks: synthesis, structural features, topological**  
3 **analysis and catalytic oxidation of alcohols**

4 **Supplementary information**

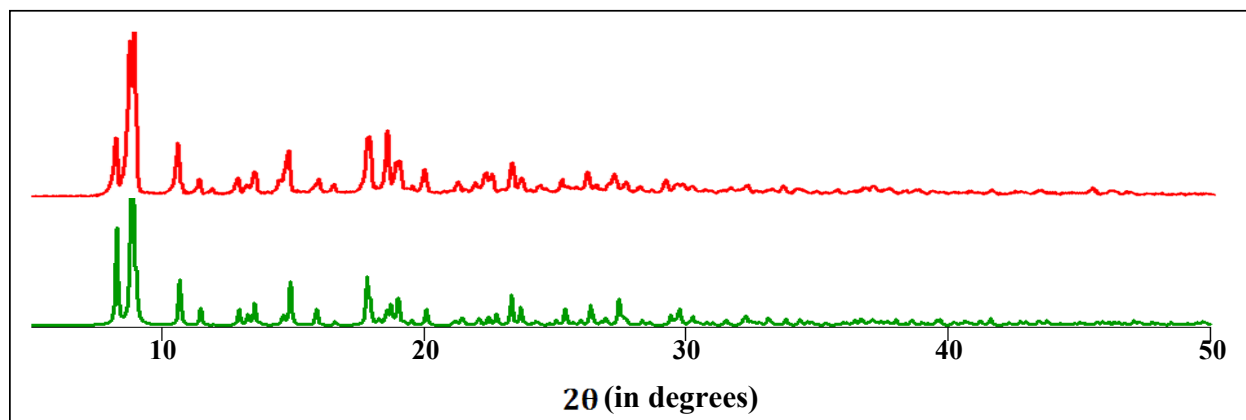

6 **Fig. S1:** PXRD patterns of the compound 1: simulated (green) and bulk sample (red)

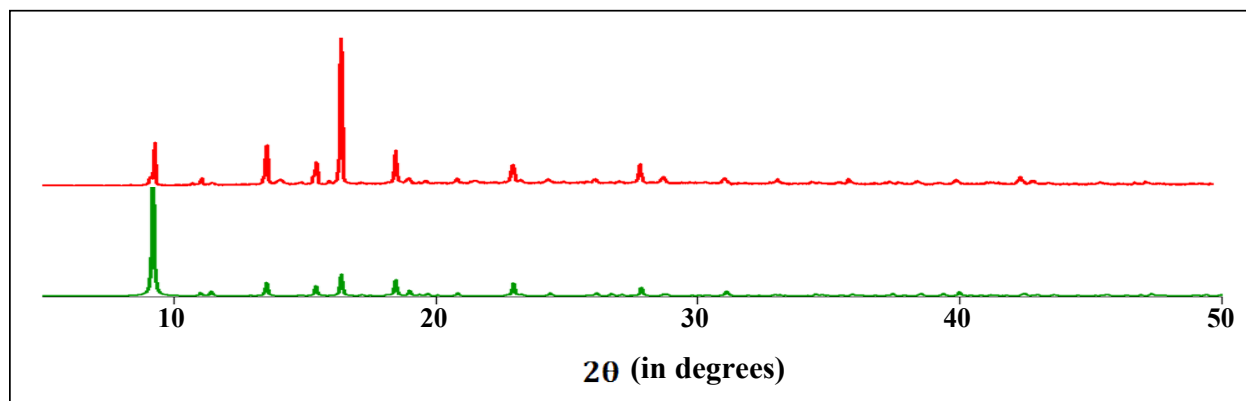

8 **Fig. S2:** PXRD patterns of the compound 2: simulated (green) and bulk sample (red)

9

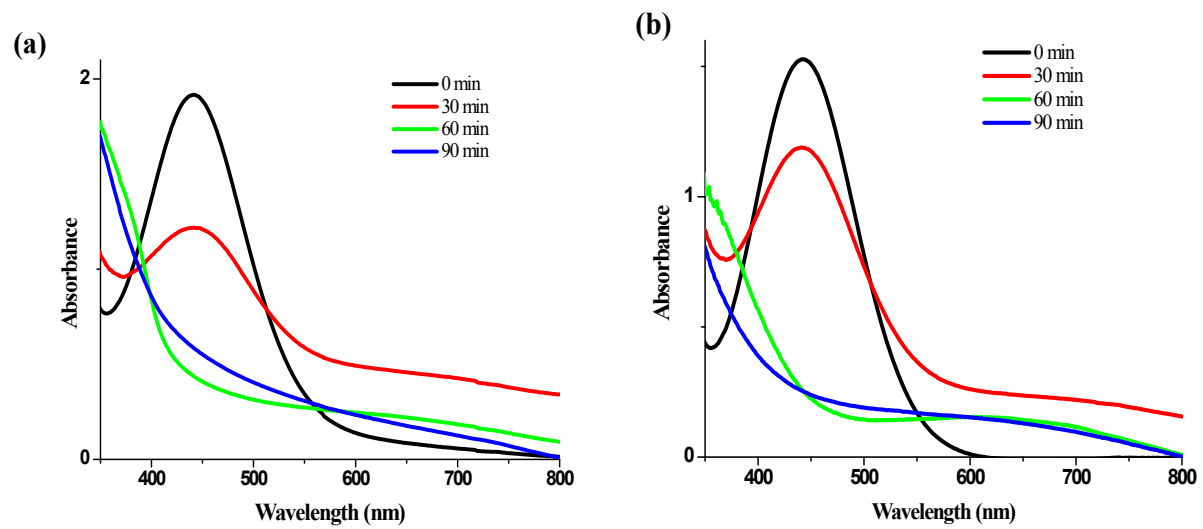

1

2 **Fig S3:** UV-vis spectra recorded while monitoring solvent-free oxidation of cyclohexanol by  
 3 TBHP/TEMPO system in the presence of **1** (a) and **2** (b).

4

5

6

7

8

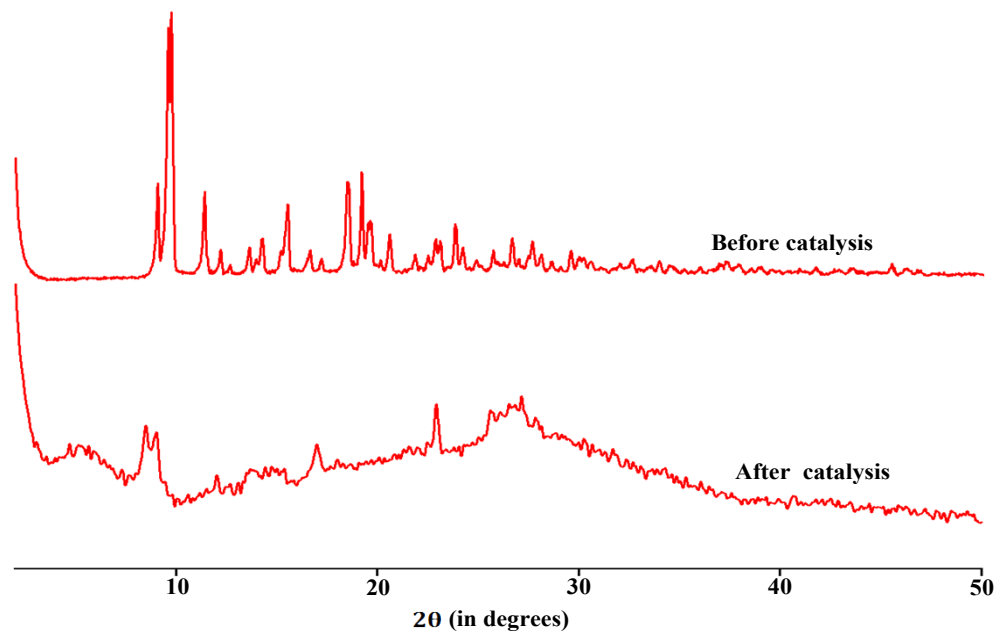

1

2 **Fig. S4:** Comparison of PXR D patterns of the compound 1 before and after using as catalyst.

3

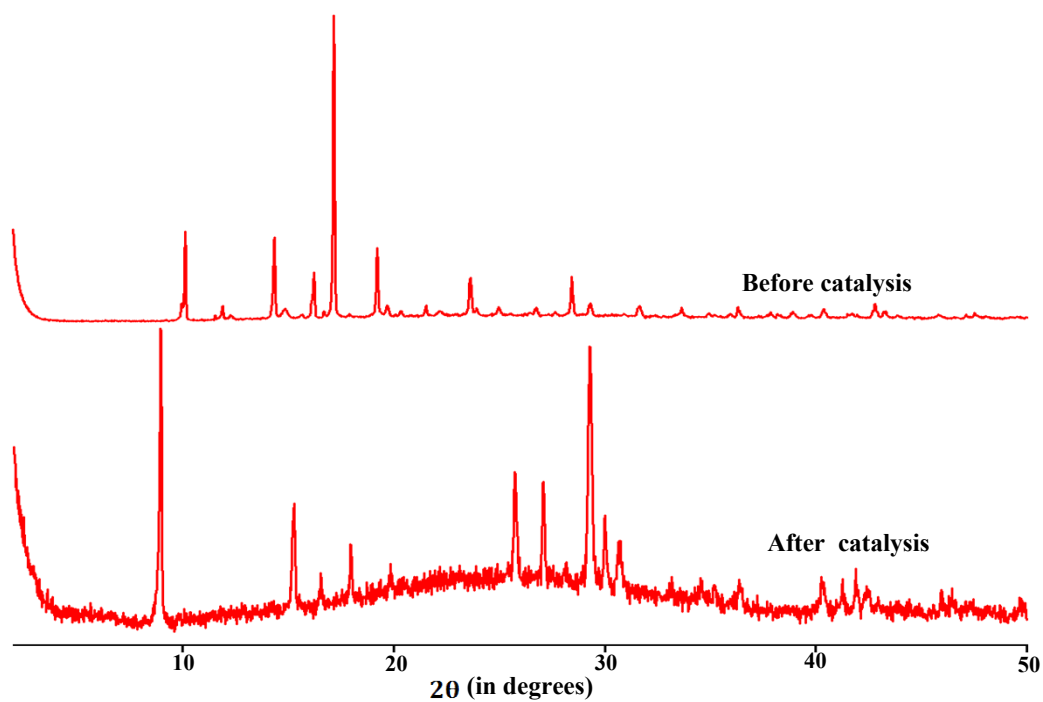

4

5 **Fig. S5:** Comparison of PXR D patterns of the compound 2 before and after using as catalyst.

6

1 **Table S1.** MW-assisted oxidation of secondary alcohols by TBHP with **1** and **2** as catalyst  
 2 precursors.<sup>a</sup>

| Entry           | Catalyst<br>Precursor | Substrate       | TOF <sup>b</sup> (h <sup>-1</sup> ) | Yield <sup>c</sup> (%) |
|-----------------|-----------------------|-----------------|-------------------------------------|------------------------|
| 1               |                       |                 | 397                                 | 79                     |
| 2 <sup>d</sup>  |                       |                 | 350                                 | 70                     |
| 3 <sup>e</sup>  |                       |                 | 185                                 | 37                     |
| 4 <sup>f</sup>  |                       | 1-phenylethanol | 15                                  | 3                      |
| 5 <sup>g</sup>  |                       |                 | 10                                  | 2                      |
| 6 <sup>h</sup>  |                       |                 | 460                                 | 92                     |
| 7 <sup>i</sup>  |                       |                 | 130                                 | 78                     |
| 8 <sup>j</sup>  |                       |                 | 110                                 | 22                     |
| 9 <sup>k</sup>  |                       |                 | 400                                 | 80                     |
| 10              |                       |                 | 290                                 | 58                     |
| 11 <sup>d</sup> |                       |                 | 265                                 | 53                     |
| 12 <sup>e</sup> |                       |                 | 145                                 | 29                     |
| 13 <sup>f</sup> |                       | cyclohexanol    | 10                                  | 2                      |
| 14 <sup>g</sup> |                       |                 | 20                                  | 4                      |
| 15 <sup>h</sup> |                       |                 | 335                                 | 67                     |
| 16 <sup>i</sup> |                       |                 | 92                                  | 55                     |
| 17 <sup>j</sup> |                       |                 | 75                                  | 15                     |
| 18 <sup>k</sup> |                       |                 | 285                                 | 57                     |
| 19              | <b>1</b>              |                 | 315                                 | 63                     |
| 20 <sup>e</sup> |                       |                 | 105                                 | 21                     |
| 21 <sup>h</sup> |                       | 2-hexanol       | 385                                 | 77                     |
| 22 <sup>j</sup> |                       |                 | 115                                 | 23                     |
| 23 <sup>k</sup> |                       |                 | 315                                 | 63                     |
| 24              |                       |                 | 285                                 | 57                     |
| 25 <sup>e</sup> |                       | 3-hexanol       | 95                                  | 19                     |
| 26 <sup>h</sup> |                       |                 | 370                                 | 74                     |
| 27              |                       |                 | 190                                 | 38                     |
| 28 <sup>e</sup> |                       |                 | 60                                  | 12                     |
| 29 <sup>h</sup> |                       | 2-octanol       | 270                                 | 54                     |
| 30 <sup>j</sup> |                       |                 | 85                                  | 17                     |
| 31 <sup>k</sup> |                       |                 | 200                                 | 40                     |
| 32              |                       |                 | 235                                 | 47                     |
| 33 <sup>e</sup> |                       | 3-octanol       | 85                                  | 17                     |
| 34 <sup>h</sup> |                       |                 | 315                                 | 63                     |
| 35              |                       |                 | 430                                 | 86                     |
| 36 <sup>d</sup> |                       |                 | 405                                 | 81                     |
| 37 <sup>e</sup> |                       |                 | 205                                 | 41                     |
| 38 <sup>f</sup> |                       | 1-phenylethanol | 25                                  | 5                      |
| 39 <sup>g</sup> |                       |                 | 15                                  | 3                      |
| 40 <sup>h</sup> |                       |                 | 495                                 | 99                     |

|                 |                                |                 |     |    |
|-----------------|--------------------------------|-----------------|-----|----|
| 41 <sup>i</sup> |                                |                 | 142 | 85 |
| 42 <sup>j</sup> |                                |                 | 165 | 33 |
| 43 <sup>k</sup> |                                |                 | 425 | 85 |
| 44              |                                |                 | 210 | 42 |
| 45 <sup>d</sup> |                                |                 | 195 | 39 |
| 46 <sup>e</sup> |                                |                 | 140 | 28 |
| 47 <sup>f</sup> |                                | cyclohexanol    | 10  | 2  |
| 48 <sup>g</sup> |                                |                 | 15  | 3  |
| 49 <sup>h</sup> |                                |                 | 320 | 64 |
| 50 <sup>i</sup> |                                |                 | 67  | 40 |
| 51 <sup>j</sup> |                                |                 | 95  | 19 |
| 52 <sup>k</sup> | <b>2</b>                       |                 | 209 | 42 |
| 53              |                                |                 | 335 | 67 |
| 54 <sup>e</sup> |                                | 2-hexanol       | 155 | 31 |
| 55 <sup>h</sup> |                                |                 | 405 | 81 |
| 56              |                                |                 | 330 | 66 |
| 57 <sup>e</sup> |                                |                 | 110 | 22 |
| 58 <sup>h</sup> |                                | 3-hexanol       | 420 | 84 |
| 59 <sup>j</sup> |                                |                 | 80  | 16 |
| 60 <sup>k</sup> |                                |                 | 335 | 67 |
| 61              |                                |                 | 290 | 58 |
| 62 <sup>e</sup> |                                | 2-octanol       | 90  | 18 |
| 63 <sup>h</sup> |                                |                 | 395 | 79 |
| 64              |                                |                 | 255 | 51 |
| 65 <sup>e</sup> |                                |                 | 70  | 14 |
| 66 <sup>h</sup> |                                | 3-octanol       | 335 | 67 |
| 67 <sup>j</sup> |                                |                 | 60  | 12 |
| 68 <sup>k</sup> |                                |                 | 245 | 49 |
| 69              |                                |                 | 35  | 7  |
| 70 <sup>e</sup> |                                | 1-phenylethanol | 15  | 3  |
| 71 <sup>h</sup> |                                |                 | 55  | 11 |
| 72              | CuCl <sub>2</sub> <sup>l</sup> | cyclohexanol    | 10  | 2  |
| 73              |                                | 2-hexanol       | 30  | 6  |
| 74              |                                | 3-hexanol       | 20  | 4  |
| 75              |                                | 2-octanol       | 30  | 6  |
| 76              |                                | 3-octanol       | 15  | 3  |

1 <sup>a</sup> Reaction conditions unless stated otherwise: 5 mmol of substrate, 10 μmol (0.2 mol% vs.  
2 substrate) of catalyst precursor, 10 mmol of TBHP (70% aq.), 80 °C, 1 h reaction time, microwave  
3 irradiation (10 W). <sup>b</sup> Turnover frequency = number of moles of product per mol of catalyst per hour  
4 (turnover number per hour). <sup>c</sup> Moles of ketone product per mol of alcohol. <sup>d</sup> 20 mmol of TBHP (4  
5 eq.). <sup>e</sup> H<sub>2</sub>O<sub>2</sub> (10 mmol) 30% aqueous solution instead of TBHP. <sup>f</sup> In the presence of Ph<sub>2</sub>NH (5  
6 mmol). <sup>g</sup> In the presence of CBrCl<sub>3</sub> (5 mmol). <sup>h</sup> In the presence of TEMPO (5 mol% vs. substrate). <sup>i</sup>  
7 3 h reaction time. <sup>j</sup> T = 50 °C. <sup>k</sup> T = 100 °C. <sup>l</sup> Included for comparative purposes.
